# Supplementary material
Source: publisher figshare collection journal article supplement (https://acs.figshare.com/ndownloader/files/8342753)
Supplement: Supplementary file 1 [file 8342753]

# Supporting Information for

  

## Low-Temperature Torrefaction of *Phyllostachys heterocyclus* cv. *pubescens*: Effect of Two Torrefaction Procedures on the Composition of Bio-Oil Obtained

Xiaoyan Lv, Zhicheng Jiang, Jindong Li, Yue Wang, Dongmei Tong, and Changwei Hu\*

Key Laboratory of Green Chemistry and Technology, Ministry of Education, College of Chemistry, Sichuan University, 29 Wangjiang Road, Chengdu, Sichuan 610064, P. R. China

E-mail: changweihu@scu.edu.cn. Phone / fax: (+86) 028-85411105.

*Number of pages: 6*

*Number of figures: 8*

*Number of tables: 2*

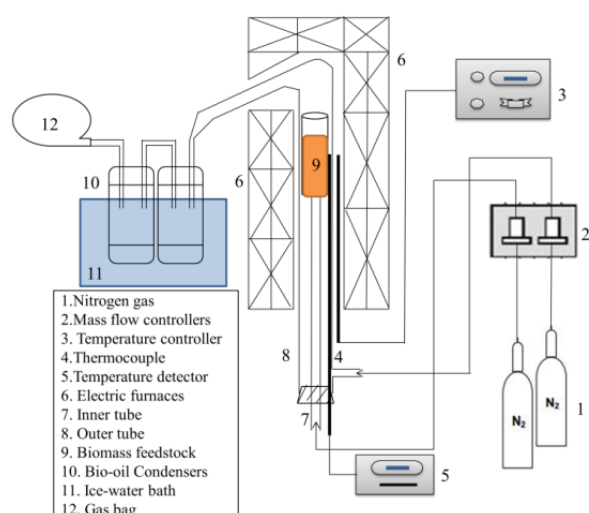

**Figure S1.** The schematic diagram of torrefaction process.

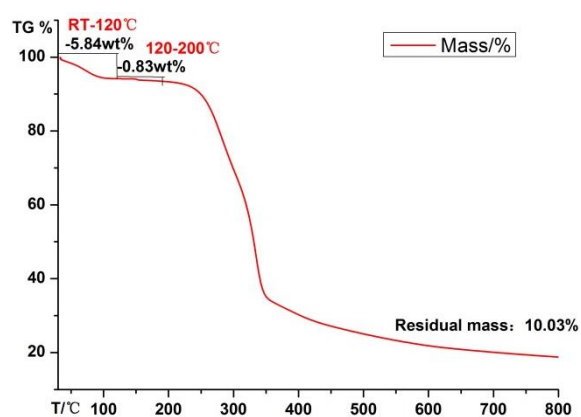

**Figure S2.** Thermogravimetric (TG) curve of *pubescens*.

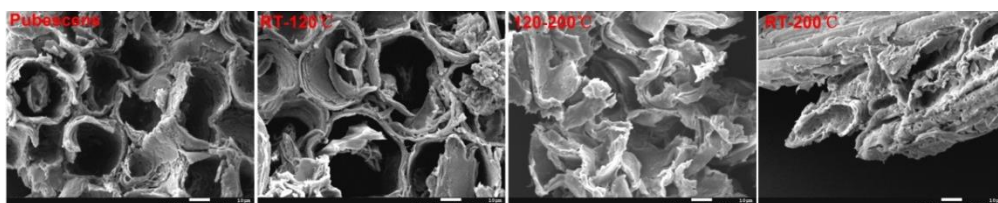

**Figure S3.** SEM micrographs of raw material and solid residues. Reaction conditions: Two-step torrefaction and one-step torrefaction of *pubescens* at 200 °C for 2 h.

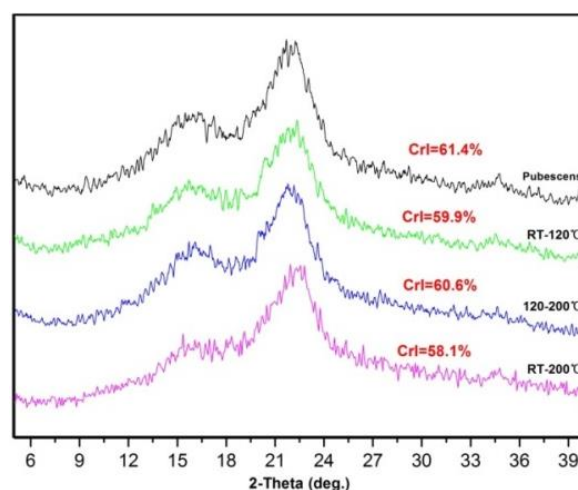

**Figure S4.** XRD of raw material and reaction residues.

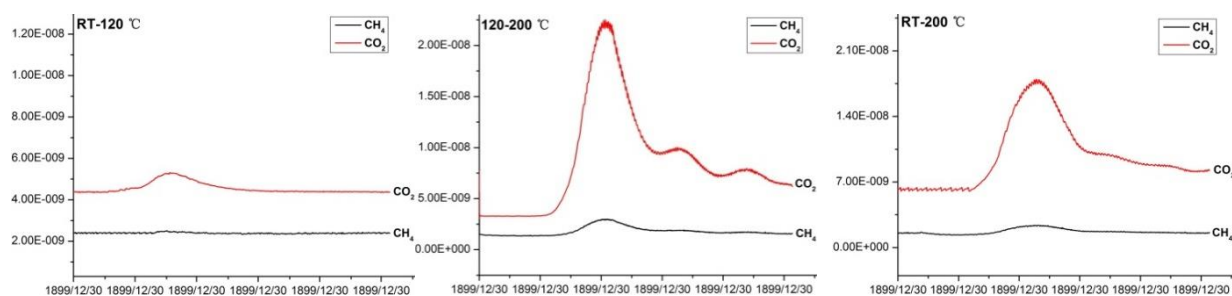

**Figure S5.** The online mass spectrometry of the off-gas from torrefaction.

**Table S1.** Weight-average (Mw) and number-average (Mn) molecular weights and polydispersity (Mw/ Mn) of the oligomers

| T/°C           | RT-120°C | 120-200°C |      | RT-200°C |      |
|----------------|----------|-----------|------|----------|------|
|                | a        | a         | b    | a        | b    |
| Mw             | 428      | 646       | 271  | 662      | 267  |
| Mn             | 367      | 528       | 265  | 535      | 261  |
| Polydispersity | 1.67     | 1.22      | 1.02 | 1.24     | 1.02 |

**Table S2.** Assignment of main lignin  $^{13}\text{C}$ - $^1\text{H}$  correlation signals in HSQC spectra of liquid fraction according to literature

| Labels                       | $\delta_{\text{C}}/\delta_{\text{H}}$ (ppm) | Assignment                                                                                                               |
|------------------------------|---------------------------------------------|--------------------------------------------------------------------------------------------------------------------------|
| OMe                          | 56.0/3.74                                   | C-H in methoysls                                                                                                         |
| $\text{C}_{\gamma}$          | 62.6/3.71                                   | $\text{C}_{\gamma}$ - $\text{H}_{\gamma}$ in phenylcoumaran substructure (C)                                             |
| $\text{C}_{\gamma}$          | 67.02/4.12                                  | $\gamma$ -ethers                                                                                                         |
| $\text{P}_{\text{OH}}$       | 71.66/3.18                                  | Pyranose OH                                                                                                              |
| $\text{C}_{\beta}$           | 83.34/4.31                                  | $\text{C}_{\beta}$ - $\text{H}_{\beta}$ in $\beta$ -O-4                                                                  |
| $\text{G}_2$                 | 111.5/6.80                                  | $\text{C}_2$ - $\text{H}_2$ in guaiacyl units (G)                                                                        |
| $\text{G}_5, \text{H}_{3,5}$ | 115.3/6.68-6.99                             | $\text{C}_5$ - $\text{H}_5$ in guaiacyl units (G) or<br>$\text{C}_{3,5}$ - $\text{H}_{3,5}$ in p-hydroxyphenyl units (H) |
| $\text{S}_{2,6}$             | 104.3/6.71                                  | $\text{C}_{2,6}$ - $\text{H}_{2,6}$ in syringyl units (S)                                                                |
| $\text{S}'_{2,6}$            | 106.5/7.26                                  | $\text{C}_{2,6}$ - $\text{H}_{2,6}$ in ( $\text{C}_{\alpha}=\text{O}$ ) syringyl units (S)                               |
| 4-O-5                        | 109.5/6.61                                  | 4-O-5 unit                                                                                                               |
| $\text{F}_2$                 | 110.7/7.26                                  | $\text{C}_2$ - $\text{H}_2$ in esterified ferulates or free ferulic acids                                                |
| $\text{F}_{\beta}$           | 114.8/6.41                                  | $\text{C}_{\beta}$ - $\text{H}_{\beta}$ in ferulates                                                                     |
| $\text{H}_{2,6}$             | 128.2/7.19                                  | $\text{C}_{2,6}$ - $\text{H}_{2,6}$ in p-hydroxyphenyl units (H)                                                         |
| $\text{H}'_{2,6}$            | 130.8/7.56                                  | $\text{C}_{2,6}$ - $\text{H}_{2,6}$ in oxidized ( $\text{C}_{\alpha}=\text{O}$ ) p-hydroxyphenyl units (H)               |

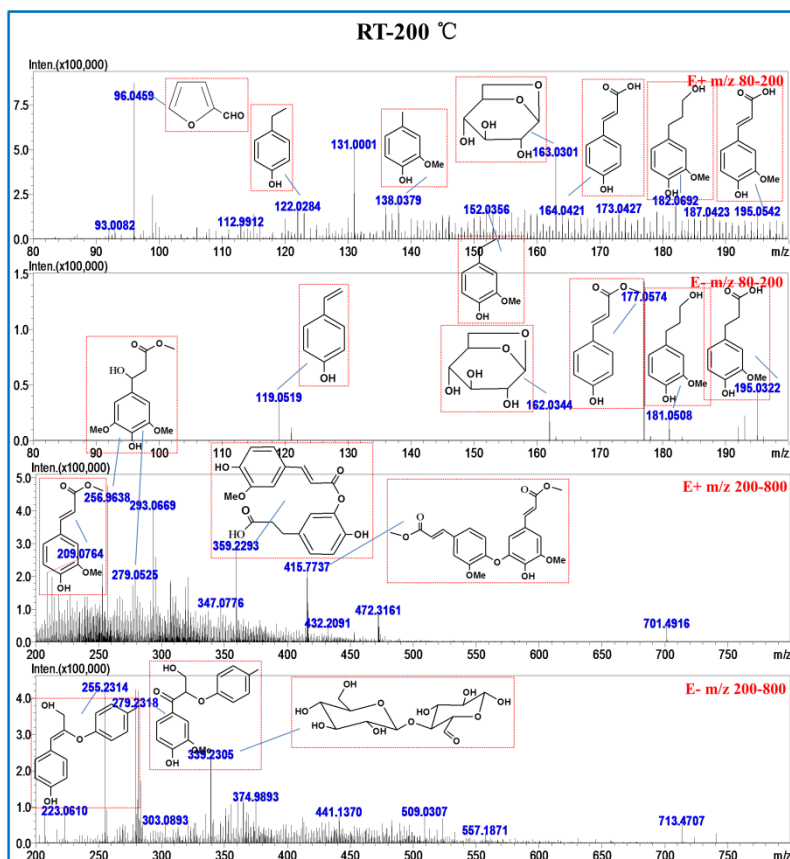

**Figure S6.** ESI-MS spectra of liquid products obtained from one-step torrefaction at RT-200 °C.

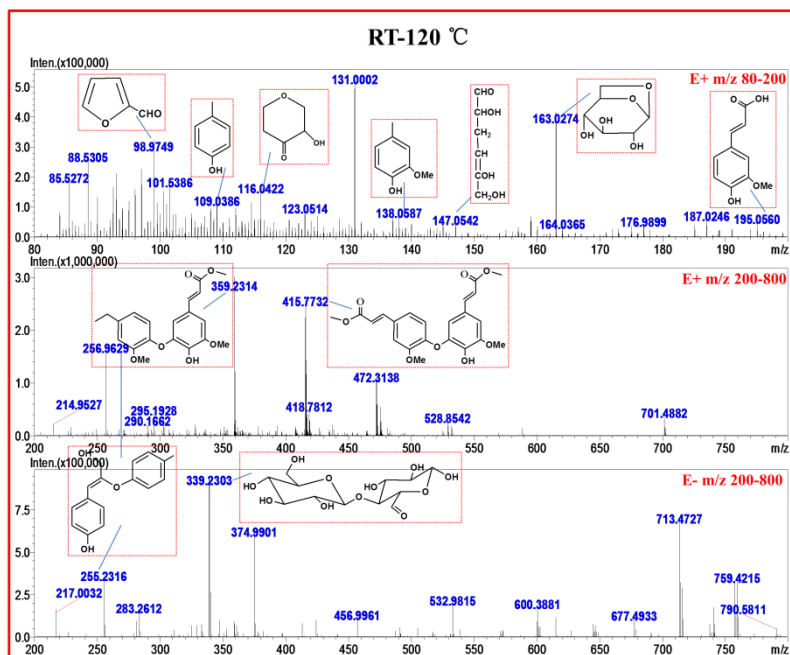

**Figure S7.** ESI-MS spectra of liquid products obtained from the first torrefaction step at RT-120 °C.

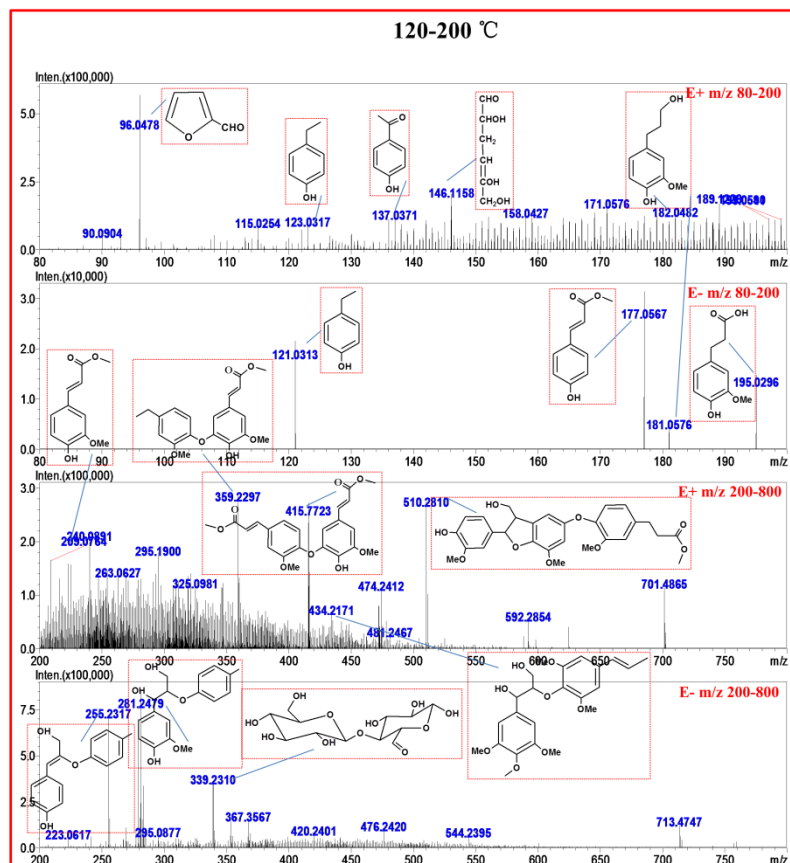

**Figure S8.** ESI-MS spectra of liquid products obtained from the second torrefaction step at 120-200 °C.
